# Supplementary material
Source: publisher figshare collection journal article supplement (https://tandf.figshare.com/ndownloader/files/15284222)
Supplement: Supplementary file 1 [file 15284222]

Synthesis of substituted *N*-phenylmaleimides and use in a Diels-Alder reaction: A green multi-step synthesis for an undergraduate organic chemistry laboratory

Loyd D. Bastina, Manisha Nigamb, Sam Martinusb, James E. Maloneyb, Landon L. Benyackb, Brendan Gainera

aDepartments of Chemistry and Biochemistry, Widener University, Chester, PA, U.S.A.

bDepartment of Chemistry, University of Pittsburgh at Johnstown, Johnstown, PA, U.S.A.

Corresponding authors: Loyd D. Bastin, [lbastin@widener.edu](mailto:lbastin@widener.edu); Manisha Nigam, [nigam@pitt.edu](mailto:nigam@pitt.edu)

**Supporting Information**

# Table of Contents

Student Handout…………………...…………………………………………………………………………..2-5

Post Lab Exercise……………….…...…..…………………………………………………………………….....6

Mechanism……………………..………..…………………………………………………………………….....7

Instructor notes…………………………………………………………………………………………………...8

Hazards…………………………...……..……………………………………………………………………9-11

IR data of the products………………….….………………………………………………………………..12-13

NMR data of product………………………………………………………………………………………..14-15

NMR data of other derivatives……………………………………………………………………………...15-19

**Student Handout**

**Synthesis of N-(4-Chlorophenyl)-maleimide for use in a green Diels-Alder Reaction**

**Background**

The maleimide moiety is key to the biological function of several chemical products used as pharmaceuticals, herbicides, and crop safeners, but they are very expensive to purchase. In this two week experiment, you will be synthesizing an N-(4-chlorophenyl)-maleimide in a two-step synthesis that utilizes cost effective green reagents and conditions. In the second week of the experiment, you will react the N-(4-chlorophenyl)-maleimide with 2,5-dimethylfuran in a Diels-Alder reaction to yield 2-(4-chlorophenyl)-3a,4,7,7a-tetrahydro-4,7-dimethyl-4,7-epoxy-1H-isoindole-1,3(2H)-dione.

**PART 1 – Synthesis of *N*-(4‐chloro)maleanilic acid**

*Scheme 1: Synthesis of maleanilic acid (****3****)*

Reagent Table 1

| **Name** | **MW (g/mol)** | **Amount added** | **mmol** | **mp (oC)** |
| --- | --- | --- | --- | --- |
| Maleic anhydride (1) | 98 | 0.588g | 6 mmol | 52.6 |
| *p*-chloroaniline (2) | 127.57 | 0.7654g | 6 mmol | 72.5 |
| Ethyl Acetate | 88.11 | 20-25mL (total) | - | - |
| - Maleanilic acid (3) | 225.63 | - |  | 199 |

**Procedure**

Obtain 10 mmol (0.980 g) of maleic anhydride (1) and 10 mmol (1.275 g) of *p*-chloroaniline (2) in two separate clean beakers. Dissolve each compound in 5 mL of ethyl acetate. Place a stir bar into *p*-chloroaniline solution and rapidly stir the solution on a stir plate. Pour the maleic anhydride solution into the *p*-chloroaniline solution; a light green precipitate should form. Stir for an additional 5 minutes while adding an additional 5 mL of ethyl acetate. Suction filter the product and use additional 3 mL of ethyl acetate to wash out beaker containing the product. Dry and weigh the product.

After setting up part 2, analyze the purity and identity of the product using IR, melting point, and TLC. To test the product by TLC, prepare spotting solutions of your amide-acid product (3) and *p*-chloroaniline in acetone (save the amide-acid spotting solution for next week). Spot each solution on the same plate and elute using a 50:50 solution of ethyl acetate and hexane. Finally, prepare an NMR solution of your maleanilic acid in d6-DMSO and submit for 1H NMR analysis. Calculate the percent yield of the product. You can use *p*-chloroaniline as the limiting reagent.

**PART 2 – Synthesis of N-(4-Chlorophenyl)-maleimide**

*Scheme 2: Synthesis of N-(4-Chlorophenyl)maleimide (4)*

Reagent Table 2

| **Name** | **MW (g/mol)** | **Amount added** | **mmol** | **mp (oC)** | **d (g/mL)** |
| --- | --- | --- | --- | --- | --- |
| Maleanilic acid (**3**) | 225.63 | 0.9025 g | 4 | 199 |  |
| Acetic anhydride | 102.09 | 3.0 mL | 30 | - | 1.08 |
| Sodium acetate | 82.03 | 0.3 g | 4 | 324 |  |
| N-(4-chlorophenyl)maleimide  (**4**) | 207.61 |  |  | 109-110 |  |

**Procedure**

**Week 1.** Prepare a solution of 0.004 mole (1.32g) of maleanilic acid **(3)** from Part 1 in 3 mL of acetic anhydride (make sure the graduated cylinder is dry) and 0.15 g of anhydrous sodium acetate. Place everything in a 25 mL RBF and heat for an hour between 60-70 °C in a heating mantle. Once reaction is complete, pour into 100 mL beaker containing 50 mL ice cold water, stir the product, and wait for the solid product to precipitate. Remove the ice cubes (if any) with forceps. Vacuum filter the product. Recrystallize the product with ethanol. After vacuum filtration, place the product in a pre-weighed beaker covered with watch glass and save this product for next week.

**Week 2.** Weigh the beaker from last week. Next, make a spotting solution of your maleimide product (4) in ethyl acetate (save for later).

After setting up part 3, analyze the purity and identity of the product using IR, melting point, and TLC. To test the product by TLC, spot the saved amide-acid (3) spotting solution from the previous step and the maleimide solution (4) on the same plate and elute in a 50:50 solution of ethyl acetate and hexane. Finally, prepare an NMR solution of your maleimide product in CDCl3 and submit for 1H NMR analysis. Calculate the percent yield. Assume amide-acid to be the limiting reagent.

**PART 3 (Week 2) – Synthesis of 2-(4-chlorophenyl)-3a,4,7,7a-tetrahydro-4,7-dimethyl-4,7-epoxy-1H-isoindole-1,3(2H)-dione**

*Scheme 3: Synthesis of 2-(4-chlorophenyl)-3a,4,7,7a-tetrahydro-4,7-dimethyl-4,7-epoxy-1H-isoindole-1,3(2H)-dione (6) using a Diels-Alder Reaction*

Reagent Table 3

| **Name** | **MW (g/mol)** | **Amount added** | **mmol** | **bp (oC)** | **mp (oC)** | **d (g/mL)** |
| --- | --- | --- | --- | --- | --- | --- |
| 2,5-dimethylfuran  **(5)** | 96.13 | Excess  (1.0 mL) | 9.4 | 93.5 | - | 0.9000 |
| N-(4-Chlorophenyl)-maleimide  (**4**) | 207.61 | 100 mg | 0.48 | - | 109-110 | - |
| Diels Alder product (**6**) | 303.74 | - | - |  | Not known |  |

**Procedure**

**Week 2.** Place 100 mg of maleimide product (4) into a 3 mL conical vial and add 1.0 mL of 2,5-dimethylfuran (5). Reflux (microscale) for 60 minutes. Cool the reaction mixture and place in ice until you see the formation of a solid. Recrystallize the product in ethanol and let dry in a pre-weighed beaker until next week.

Analyze the purity of your product by TLC. To test the product by TLC, begin by making spotting solution of your Diels-Alder product in ethyl acetate. Spot the maleimide solution (from part 2) and the Diels-Alder solution on the same plate and elute in 50:50 solution of ethyl acetate and hexane.

**Week 3.** Weigh the product. Next, analyze the purity and identity of the product using IR and melting point. Finally, prepare an NMR solution of your Diels-Alder product in CDCl3 and submit for 1H NMR analysis. Calculate the percent yield of the product (6). Assume, N-(4-Chlorophenyl)-maleimide (**4**) to be the limiting reagent.

**Post Laboratory Questions**

1. Identity of each product based on evidence (NMR, IR, MP, Rf)
2. Discuss the reaction efficiency of each step using percent yield and atom economy
3. Perform a green analysis using the 12 principles, effective mass yield (hazardous substances used), and waste generated (E-factor)
4. Suggest any modifications

**Mechanism**

Complete the mechanism below by adding arrows and formal charges.

**Instructor Notes**

**Schedule**

**Week 1 –** Part 1 and 2 reactions

**Week 2 –** (1) Part 3 reaction; (2) MPs, TLC, NMR prep for parts 1 and 2

**Week 3 –** MPs, TLC, NMR prep for part 3

**PART 1 – Synthesis of *N*-(4‐chloro)maleanilic acid**

1) Use relatively fresh maleic anhydride and make sure they use dry glassware

2) MP ~190°C

3) Make sure the product is air-dried by spreading on a watch glass before weighing by the students.

3) NMRs attached (in *d6*-DMSO)

**PART 2 – Synthesis of N-(4-chlorophenyl)maleimide**

1) Use relatively fresh acetic anhydride

2) MP ~115°C

2) NMRs attached (in CDCl3)

**PART 3 – Synthesis of N-(4-chlorophenyl)maleimide (4) with 2,5-dimethylfuran (5) to yield 2-(4-chlorophenyl)-3a,4,7,7a-tetrahydro-4,7-dimethyl-4,7-epoxy-1*H*-isoindole-1,3(2*H*)-dione**

1) MP ~125°C

2) NMRs attached (in CDCl3)

This reaction has been performed by second-year undergraduates at the University of Pittsburgh at Johnstown (over **53** students in total).

**Hazards:**

- - **Maleic Anhydride** CAS Number: **108-31-6**

Harmful if swallowed. Causes severe skin burns and eye damage. May cause an allergic skinreaction. May cause allergy or asthma symptoms or breathing difficulties if inhaled. Causesdamage to organs (Respiratory system) through prolonged or repeated exposure if inhaled. Maycause damage to organs (Kidney) through prolonged or repeated exposure if swallowed.


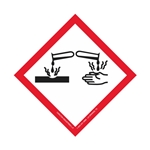

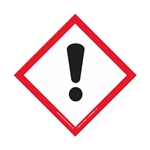

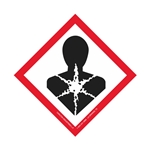


- **4-chloroaniline** CAS Number: **106-47-8**

Toxic if swallowed, in contact with skin or if inhaled. May cause an allergic skin reaction. May

cause cancer. Very toxic to aquatic life. Harmful to aquatic life with long lasting effects.


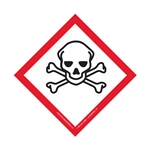

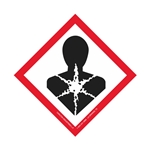


- **Ethyl Acetate** CAS Number: **141-78-6**

Highly flammable liquid and vapor. Causes serious eye irritation. May cause drowsiness or

dizziness


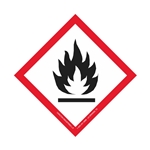

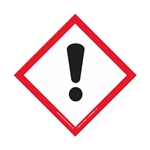


- ***N*-(4-chloro)maleanilic acid** CAS Number : 7242-16-2

No known hazards available for compound at this time. Maleanilic acid causes skin irritation, eye irritation, and my cause respiratory irritation.


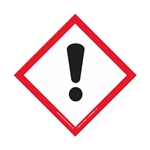


- **Acetic Anhydride** CAS Number:**108-24-7**

Flammable liquid and vapor. Harmful if swallowed. Causes severe skin burns and eye damage.

Fatal if inhaled.


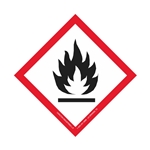

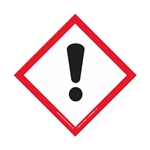

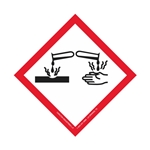


- **Sodium Acetate** CAS Number: **127-09-3**

May cause eye and skin irritation. May cause respiratory tract irritation.


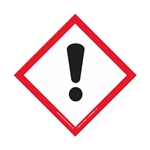


- **N-(4-chlorophenyl)maleimide** CAS Number: **1631-29-4**

Harmful if swallowed. Causes skin irritation. Causes serious eye damage. May cause respiratory

irritation.


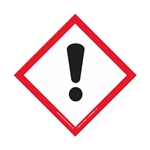


- **2,5-dimethylfuran** CAS Number: **625-86-5**

Highly flammable liquid and vapor. Harmful if swallowed. Harmful to aquatic life with long

lasting effects.


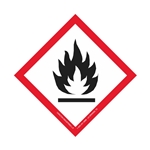

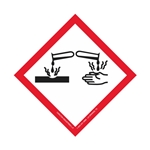

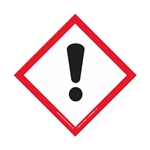


- **4,7-Epoxy-1H-isoindole-1,3(2H)-dione, 2-(4-chlorophenyl)-3a,4,7,7a-tetrahydro-4,7-**
- **dimethyl** CAS Number **359851-61-9**

No known hazards available for compound at this time. Based on similar molecules: Harmful if swallowed. Causes skin and eye irritation. May cause respiratory irritation.


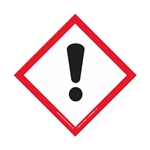


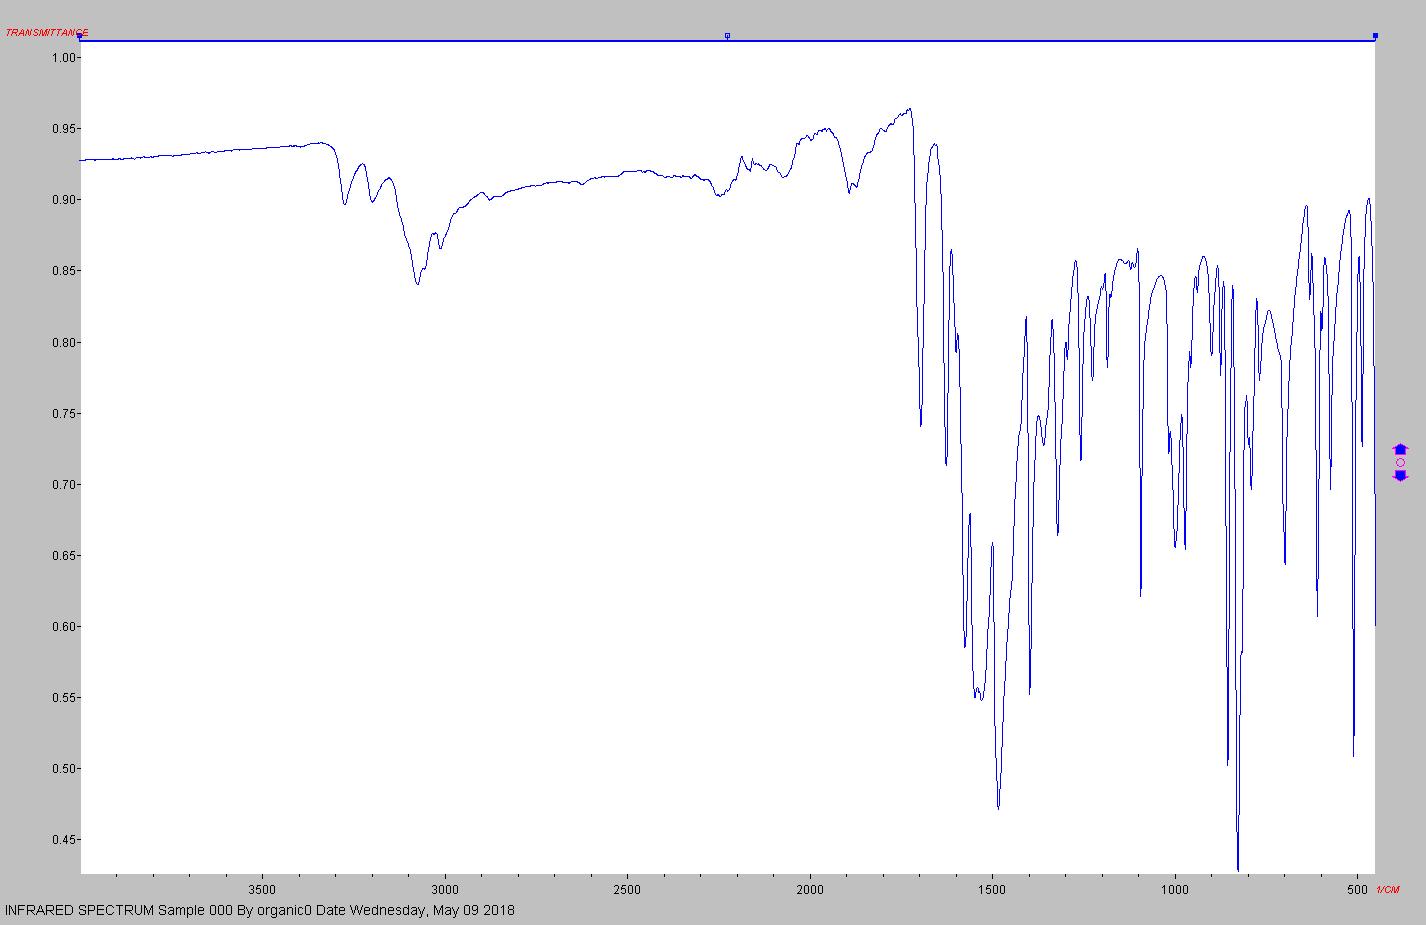


C=O

stretch

Figure 1: FT-IR spectrum of N-(4-chloro)maleanilic acid (**3a**).


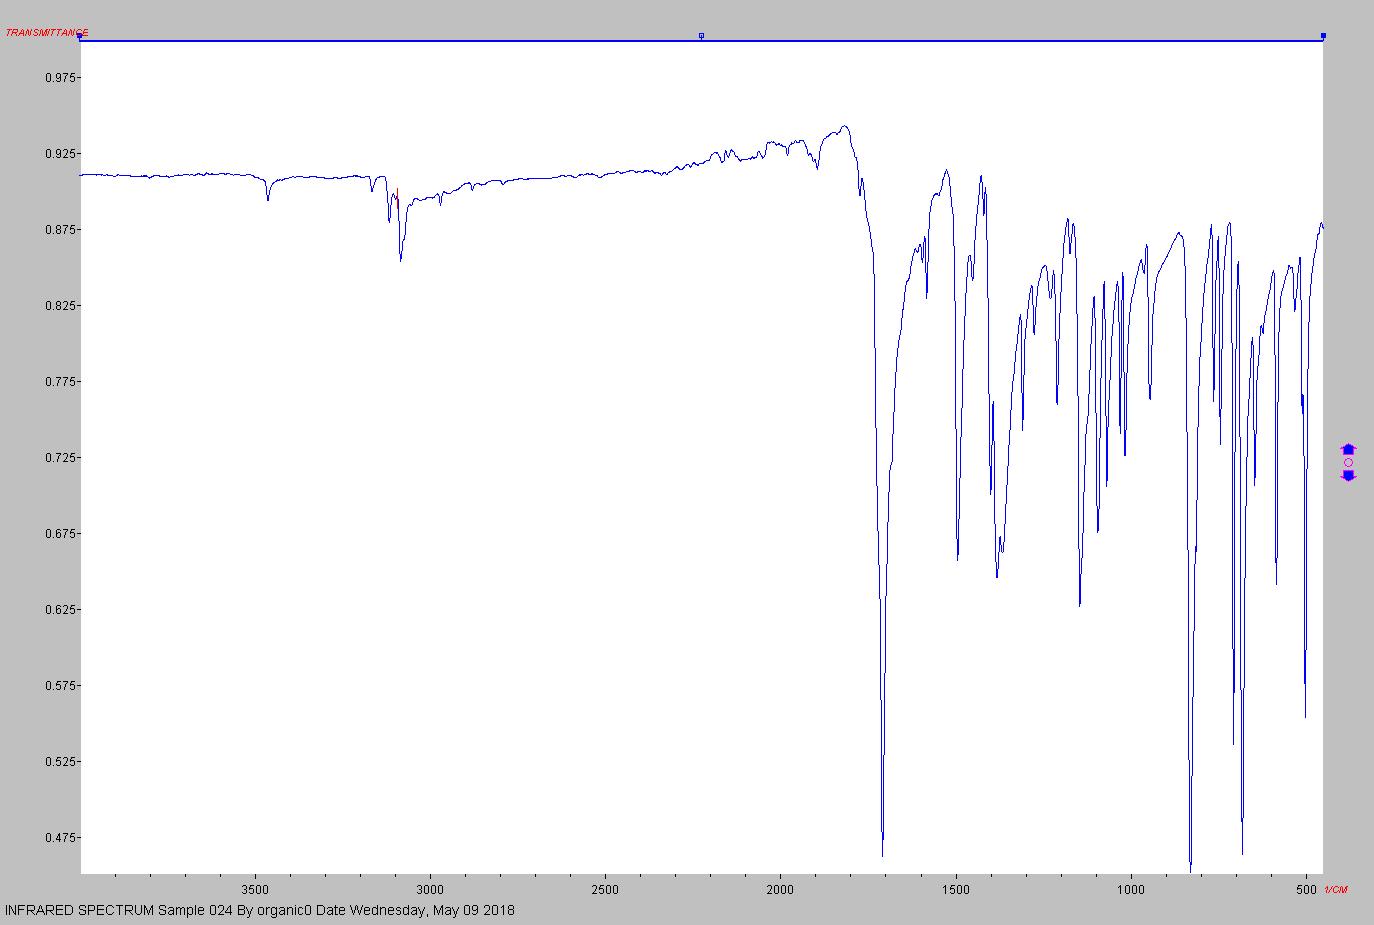


C=O

stretch

*Figure 2: FT-IR spectrum of N-(4-chlorophenyl)maleimide* (**4a**).


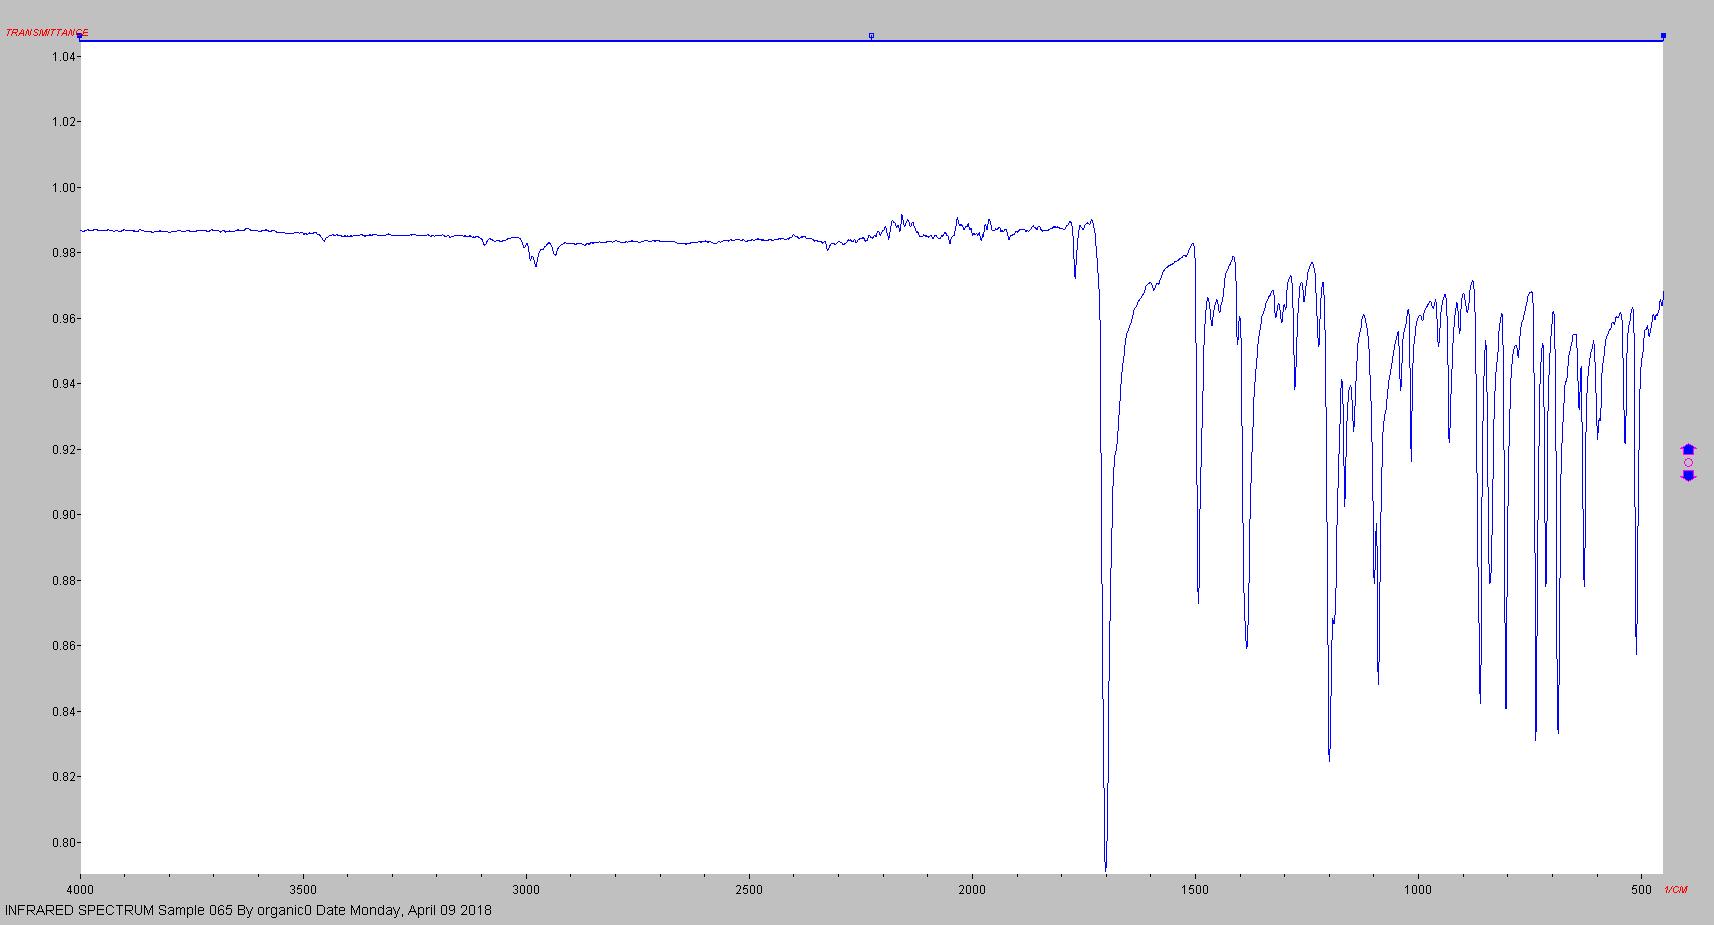


C=O

stretch

Figure 3: FT-IR spectrum of dimethylfuran-N-(4-chlorophenyl)maleimide cycloadduct (**6a**).


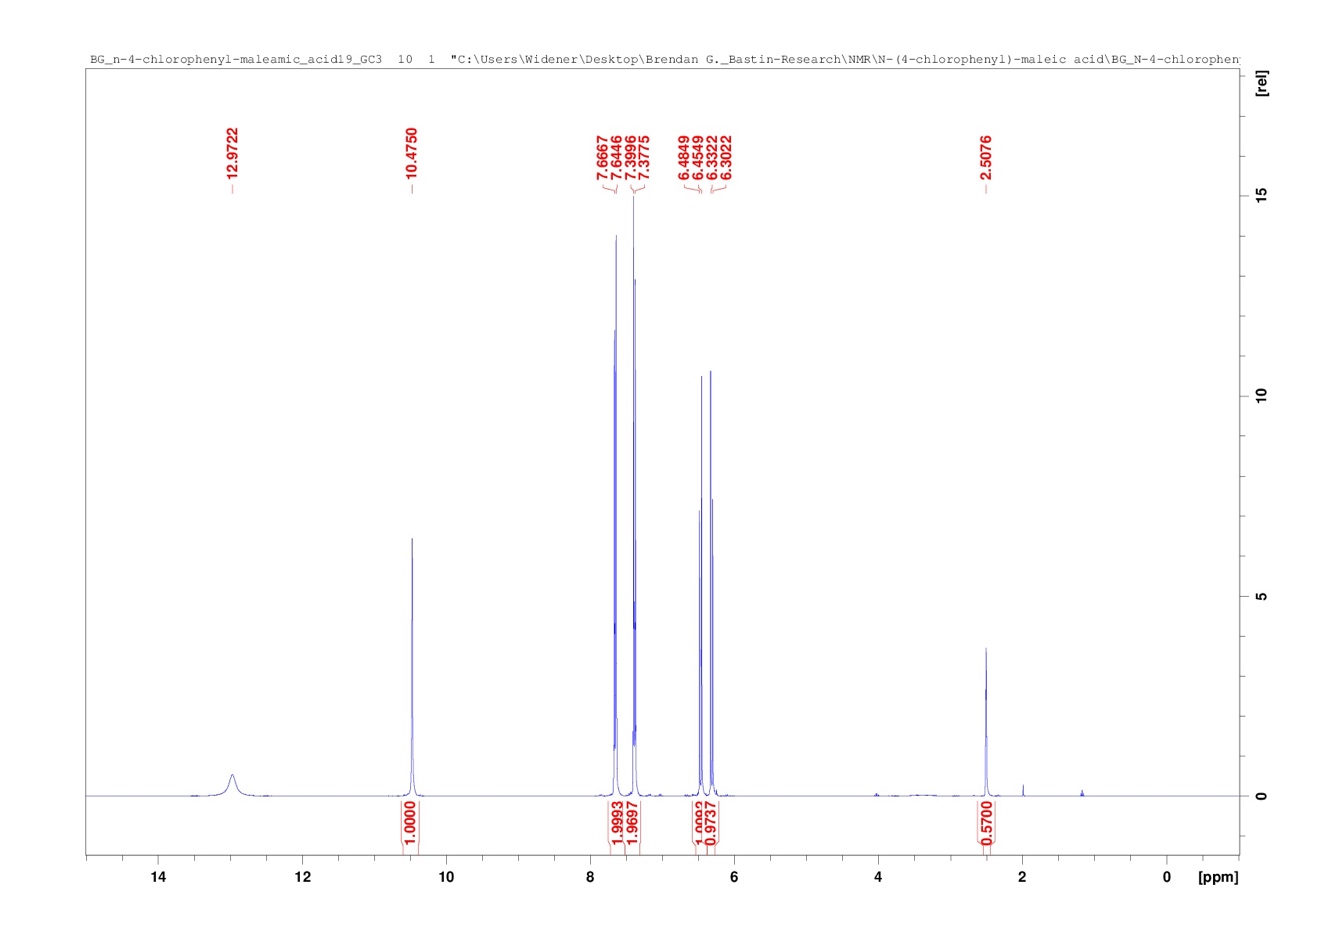


c

b

a

f

e

d

*Figure 4: 1H NMR spectrum of N-(4-chloro)maleaniliic acid (****3a****) in d6-DMSO with 0.05% TMS using Bruker 400-MHz spectrometer.*


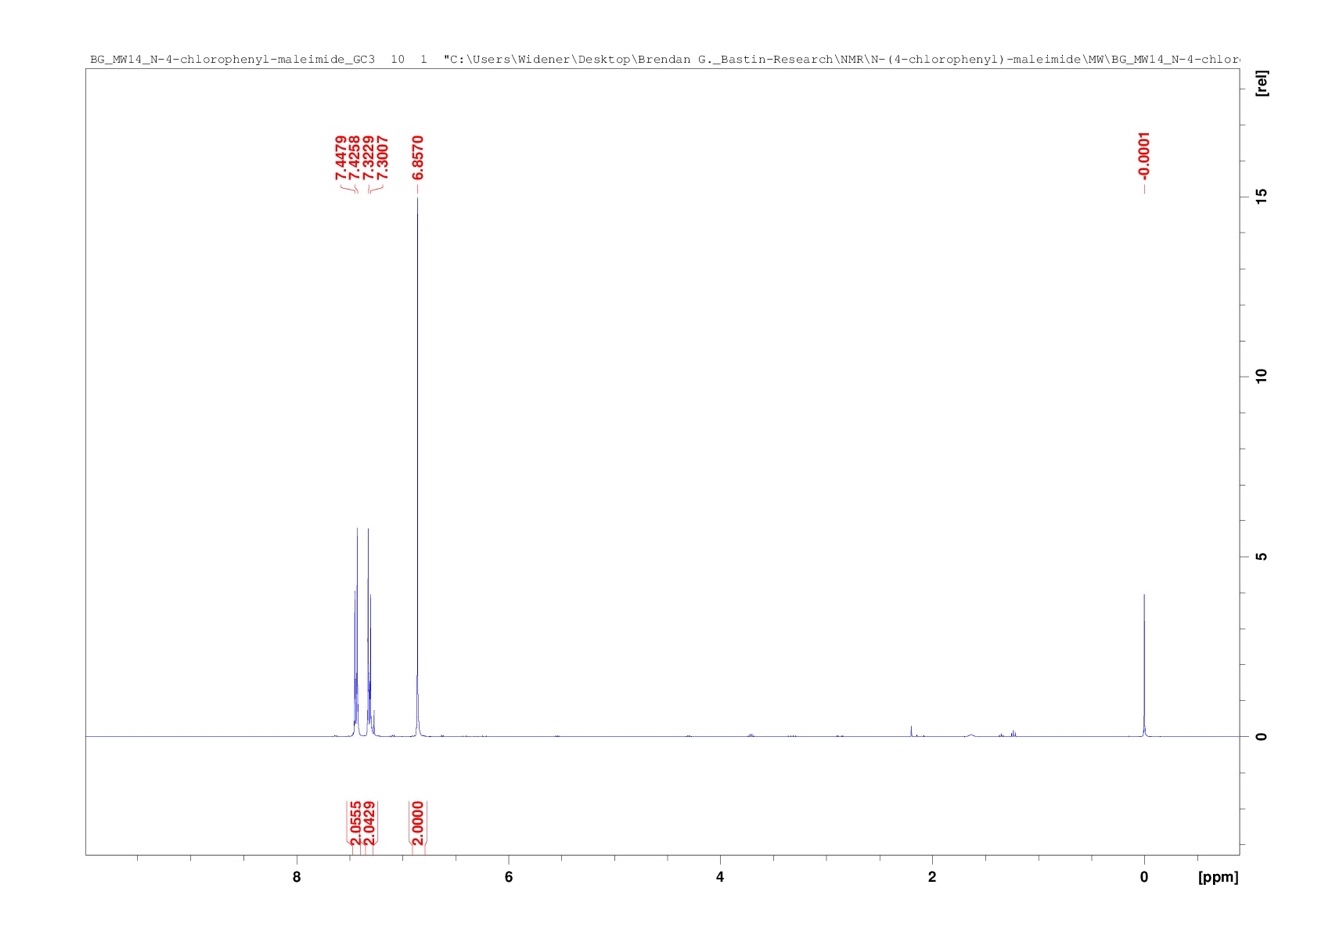


c

b

a

*Figure 5: 1H NMR spectrum of N-(4-chlorophenyl)maleimide (****4a****) in CDCl3 with 0.3% TMS using Bruker 400-MHz spectrometer.*


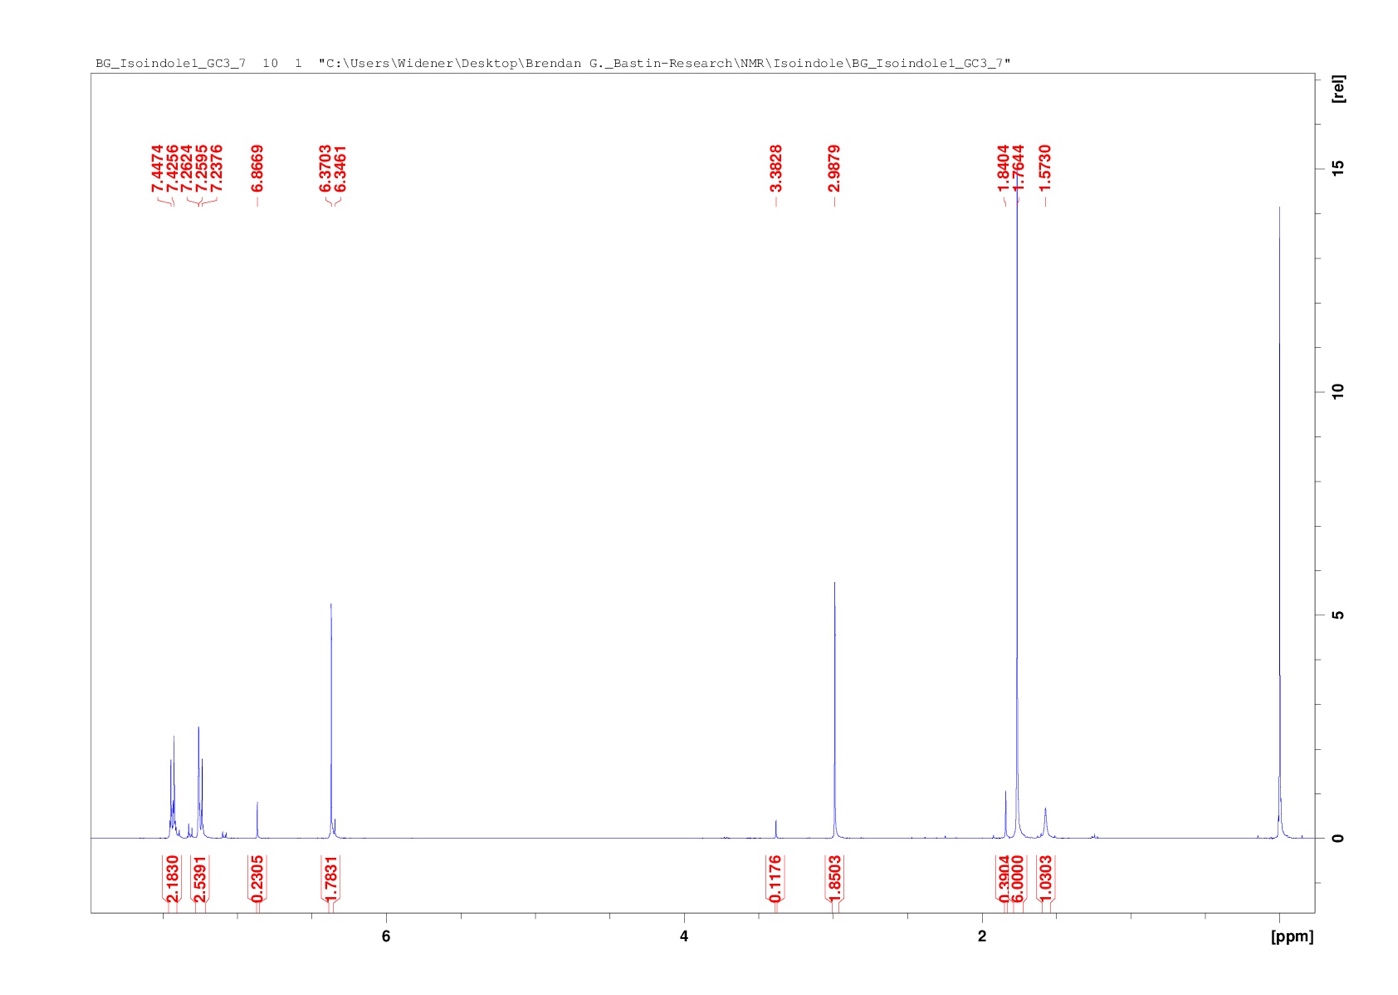


b

c

a

e

d

*Figure 6: 1H NMR spectrum of dimethylfuran-N-(4-chlorophenyl)maleimide cycloadduct (****6a****) in CDCl3 with 0.3% TMS using Bruker 400-MHz spectrometer.*

g

b

f

e

c

d

*Figure 7: 1H NMR spectrum of N-(4-methoxy)maleanilic acid (****3b****) in d6-DMSO with 0.05% TMS using Bruker 400-MHz spectrometer.*

b

c

d

a

*Figure 8: 1H NMR spectrum of N-(4-methoxyphenyl)maleimide (****4b****) in CDCl3 with 0.3% TMS using Bruker 400-MHz spectrometer.*

f

e

c

b

a

d

Figure 9: 1H NMR spectrum of dimethylfuran-N-(4-methoxyphenyl)maleimide cycloadduct (**6b**) in CDCl3 with 0.3% TMS using Bruker 400-MHz spectrometer.

g

b

c

f

e

d

*Figure 10: 1H NMR spectrum of N-(4-methyl)maleanilic acid (****3c****) in d6-DMSO with 0.05% TMS using Bruker 400-MHz spectrometer.*

c

b

a

d

*Figure 11: 1H NMR spectrum of N-(4-methylphenyl)maleimide (****4c****) in CDCl3 with 0.3% TMS using Bruker 400-MHz spectrometer.*

d

e

a

f

c

b

Figure 12: 1H NMR spectrum of dimethylfuran-N-(4-methylphenyl)maleimide cycloadduct (**6c**) in CDCl3 with 0.3% TMS using Bruker 400-MHz spectrometer.


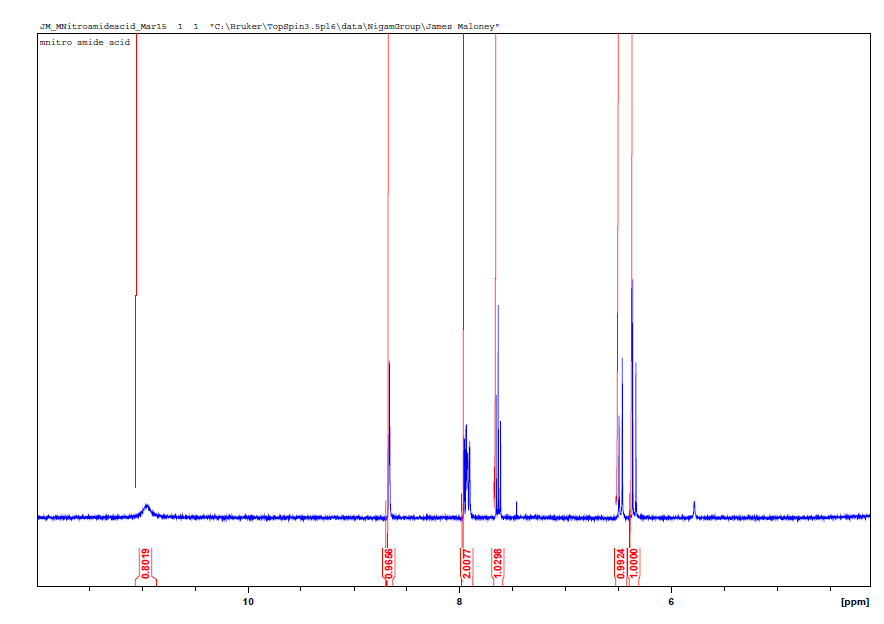


f,h

g

c

b

e

d

*Figure 13: 1H NMR spectrum of N-(3-nitro)-maleanilic acid (****3d****) in d6-DMSO with 0.05% TMS using Bruker 400-MHz spectrometer.*

d,e

b,c

a

*Figure 14: 1H NMR spectrum of N-(3-nitrophenyl)maleimide (****4d****) in d6-DMSO with 0.05% TMS using Bruker 400-MHz spectrometer.*

f,g

d,e

c

b

a

Figure 15: 1H NMR spectrum of dimethylfuran-N-(3-nitrophenyl)maleimide cycloadduct (**6d**) in CDCl3 with 0.3% TMS using Bruker 400-MHz spectrometer.
